# Supplementary material for: The Kappa Opioid Receptor Agonist 16-Bromo Salvinorin A Has Anti-Cocaine Effects without Significant Effects on Locomotion, Food Reward, Learning and Memory, or Anxiety and Depressive-like Behaviors
Source: MDPI journal article supplement (doi:10.3390/molecules28124848), 2023-06-19
Supplement: s1 [file s1]

Supplementary material for

**The Kappa Opioid Receptor Agonist 16-Bromo Salvinorin A Has Anti-Cocaine Effects Without Significant Effects on Locomotion, Food Reward, Learning and Memory, or Anxiety and Depressive-like Behaviors.**

Ross van de Wetering, Amy Ewald, Susan Welsh, Lindsay Kornberger, Samuel E. Williamson, Bryan D. McElroy, Eduardo R. Butelman, Thomas E. Prisinzano, and Bronwyn M. Kivell

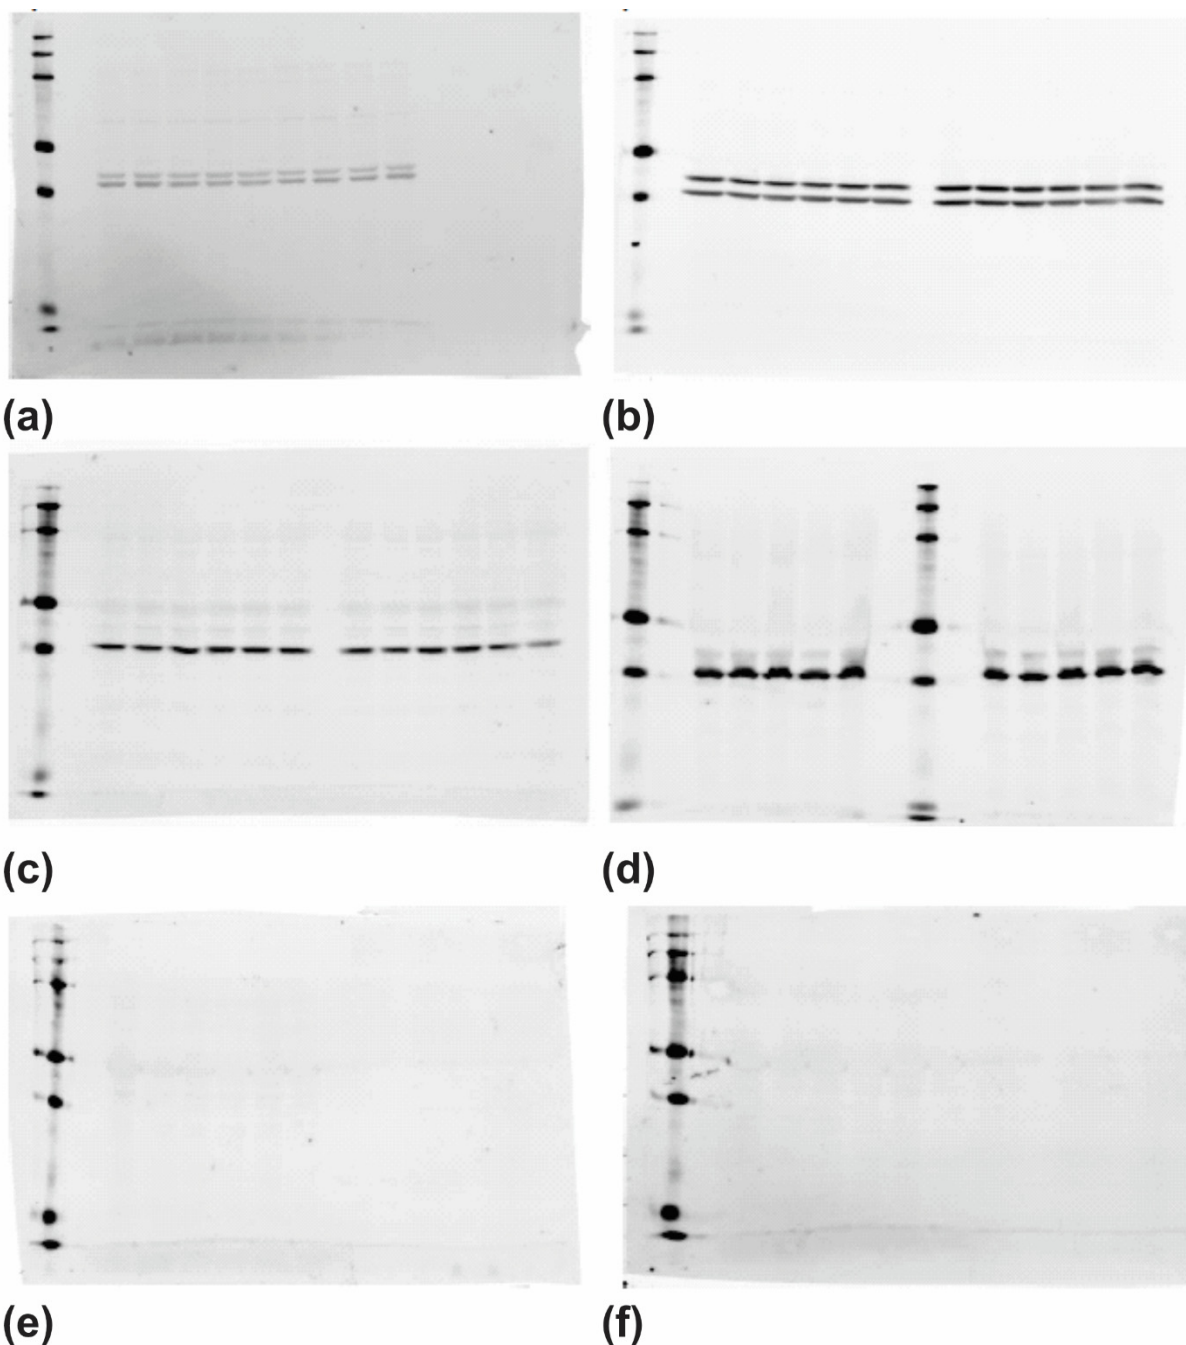

**Figure S1.** Representative western blot membranes for p-ERK1/2 (a), ERK1/2 (b), p-p38 (c), and p38 (d). Control blots showing non-specific binding of anti-mouse Cy5 (e) and anti-rabbit Cy5 (f).
